# Supplementary material for: Fabrication of 2D rod like structure MoO 3 anchored on 2D nitrogen rich sheet g-C 3 N 5 for improvised in visible light absorption for boosting photocatalytic degradation of Doxycycline
Source: Research Square preprint supplement (doi:10.21203/rs.3.rs-4902027/v1), 2024-09-10
Supplement: Supplementary file 1 [file 1bef27bcad0366e5688cf3bd.docx]

**Fabrication of 2D rod like structure MoO3 anchored on 2D nitrogen rich sheet g-C3N5 for improvised in visible light absorption for boosting photocatalytic degradation of Doxycycline**

Ganesh Nithya Shree1, Benjamin Moses Filip Jones1, Kanagavel Mahendran Devi Satiya1, Ramar Sivagurusundar2, Erumaipatty Rajagounder Nagarajan1,*

1Department of Chemistry, Nanomaterials Laboratory, International Research Centre, Kalasalingam Academy of Research and Education, Krishnankoil - 626126, Tamil Nadu, India

2Sri Paramakalyani Centre of Excellence in Environmental Sciences, Manonmaniam Sundaranar University, Alwarkurichi, - 627412, Tamil Nadu, India

Corresponding author E-mail address: [nagarajanklu@gmail.com](mailto:nagarajanklu@gmail.com) (E.R. Nagarajan)

**List of Figures**

**Fig. S1.** EDX spectrum of [MoO3@g-C3N5 (10 wt.%](mailto:MoO3@g-C3N5(wt.%25))

**Fig. S2.** EDX element mapping of the composite MoO3@g-C3N5 (10 wt.%)

**Fig. S3.** (a) Evaluation of the reusability of [MoO3@g-C3N5 (10 wt.%](mailto:MoO3@g-C3N5(wt.%25)) for degradation of Doxycycline, (b) XRD patterns of [MoO3@g-C3N5 (10 wt.%](mailto:MoO3@g-C3N5(wt.%25)) before and after Doxycycline degradation

**
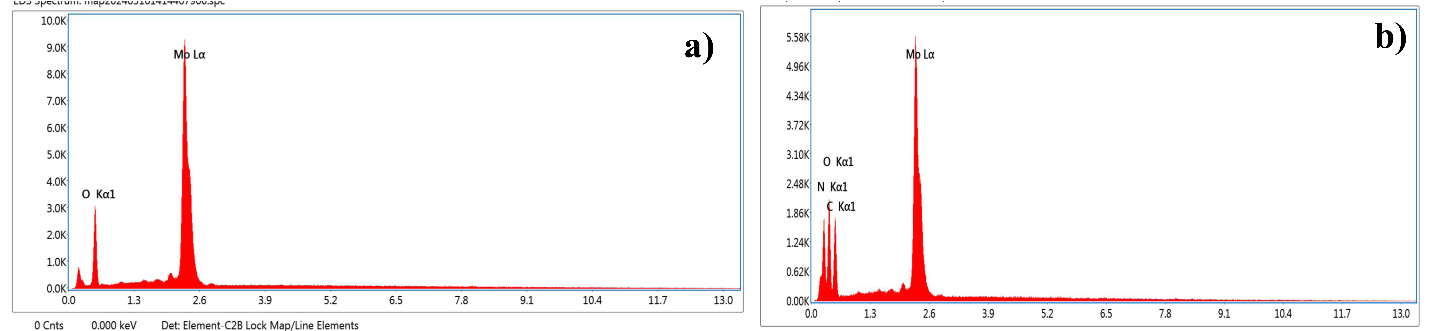
**

**Fig. S1** EDX spectrum of [MoO3@g-C3N5 (10 wt.%](mailto:MoO3@g-C3N5(wt.%25))

**
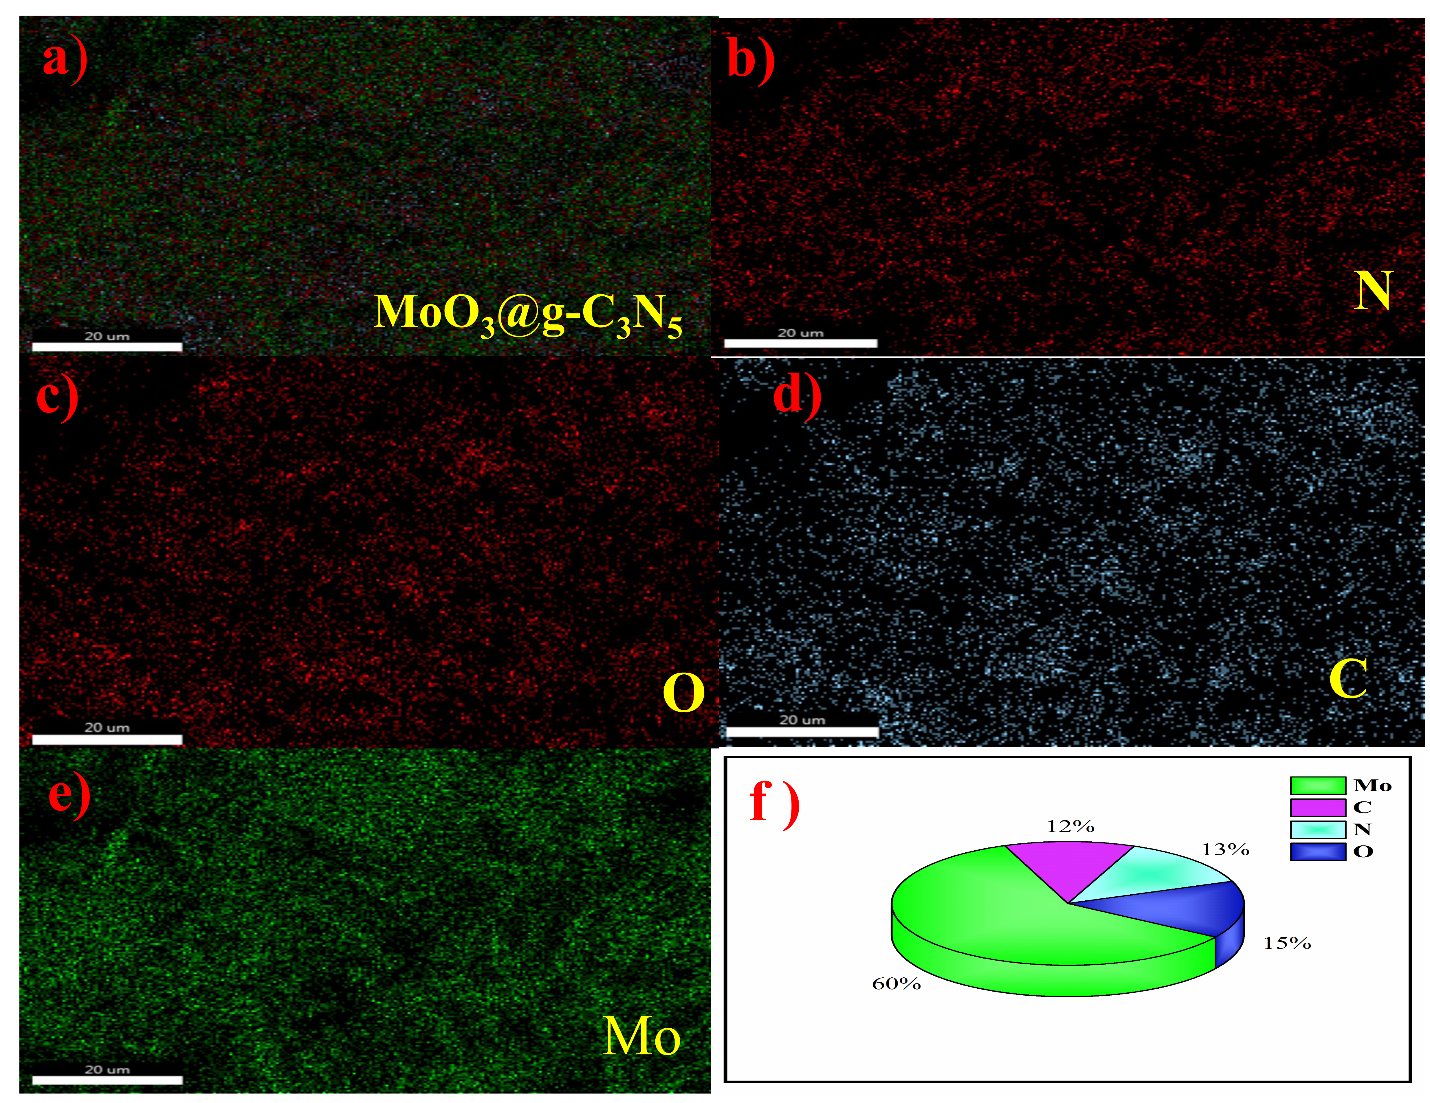
**

**Fig. S2** EDX element mapping of the composite MoO3@g-C3N5 (10 wt.%)


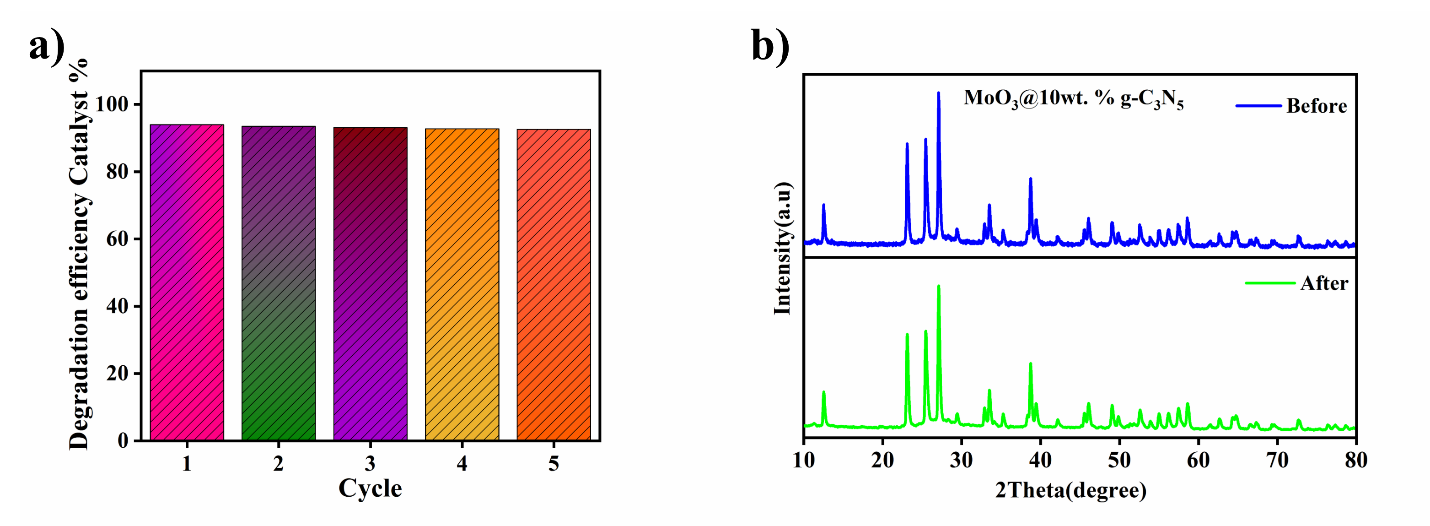


**Fig. S3** (a) Evaluation of the reusability of [MoO3@g-C3N5 (10 wt.%](mailto:MoO3@g-C3N5(wt.%25)) for degradation of Doxycycline, (b) XRD patterns of [MoO3@g-C3N5 (10 wt.%](mailto:MoO3@g-C3N5(wt.%25)) before and after Doxycycline degradation
